# Supplementary material for: Novel disulfide bond bridged 7-ethyl-10-hydroxyl camptothecin-undecanoic acid conjugate/human serum albumin nanoparticles for breast cancer therapy
Source: Royal Society of Chemistry journal article supplement (doi:10.1039/d2tb02506j), 2023-01-01
Supplement: d2tb02506j1.pdf [file d2tb02506j1.pdf]

Supporting Information for

**Novel disulfide bond bridged 7-ethyl-10-hydroxyl camptothecin-undecanoic acid conjugate/human serum albumin nanoparticles for breast cancer therapy**

Yanhao Zhang, Ji, Wang, Chao liu, Hanlei Xing, Yuhao, Jiang and Xinsong Li\*

School of Chemistry and Chemical Engineering, Southeast University, Nanjing 211189, P. R. China

\* Correspondence author, email: [lixs@seu.edu.com](mailto:lixs@seu.edu.com) (X. Li)

**Table of Contents**

|                                                                                                                                                                           |   |
|---------------------------------------------------------------------------------------------------------------------------------------------------------------------------|---|
| <b>Figure S1.</b> <sup>1</sup> H NMR spectra. (A) 2-(Pyridin-2-yl)disulfanyl-ethanol. (B) 4-Nitrophenyl (2-(pyridin-2-yl)disulfanyl)ethyl carbonate. (C) SN38-SS-Py ..... | 2 |
| <b>Figure S2.</b> (A-B) Stability analysis of SNH NPs with feed mole ratio 9:1 of SN38-SS-COOH:HSA based on the change of particle size at different time by DLS .....    | 4 |
| <b>Figure S3.</b> HPLC spectrum of SNH NPs after 24 h incubation in PBS.....                                                                                              | 4 |
| <b>Figure S4.</b> HPLC spectra. (A) SN38. (B) SN38-SS-COOH conjugate. (C) SNH NPs. (D) SNH NPs incubation in PBS with 20 mM GSH for 6 h. ....                             | 5 |
| <b>Table S1.</b> Physicochemical properties of SNH NPs encapsulated with DiR .....                                                                                        | 6 |
| <b>Table S2.</b> Cytotoxicity (IC <sub>50</sub> <sup>a</sup> values) of free SN38, free SN38-SS-COOH, irinotecan and SNH NPs against cancer cell lines by MTT assay ..... | 6 |

**A**

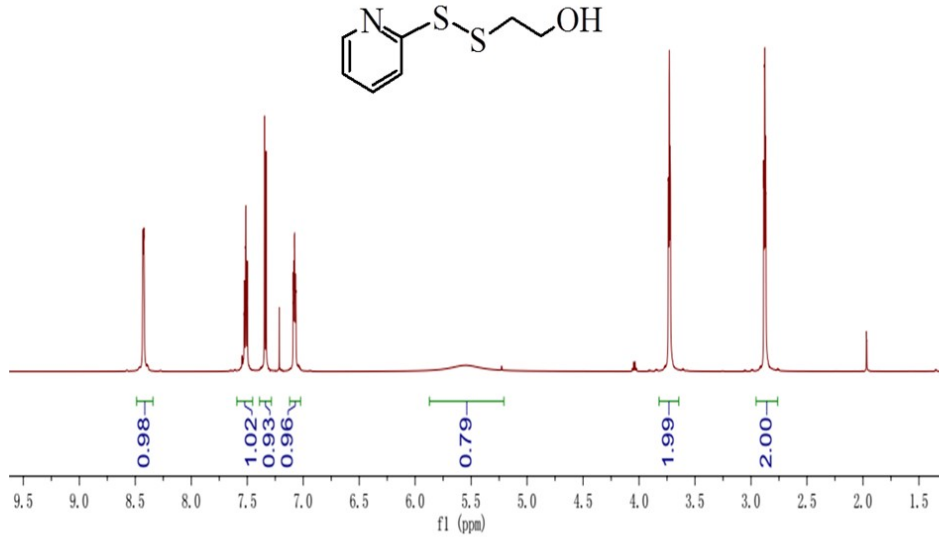

**B**

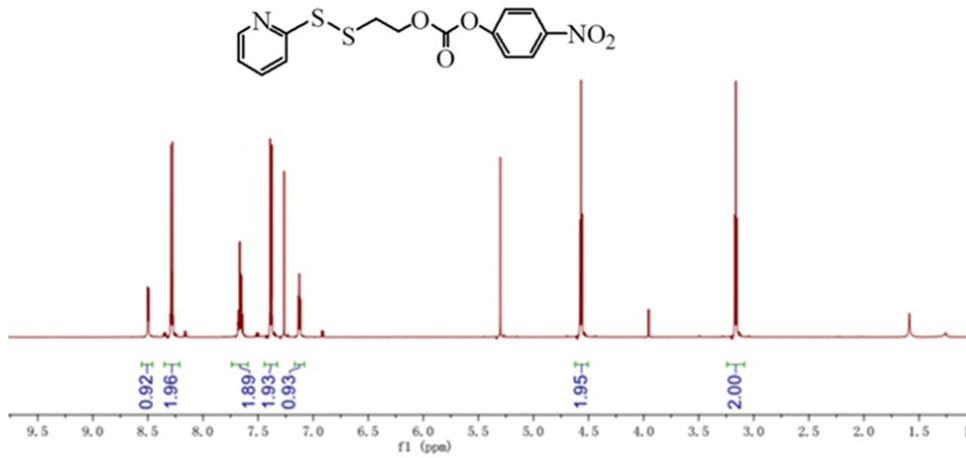

**C**

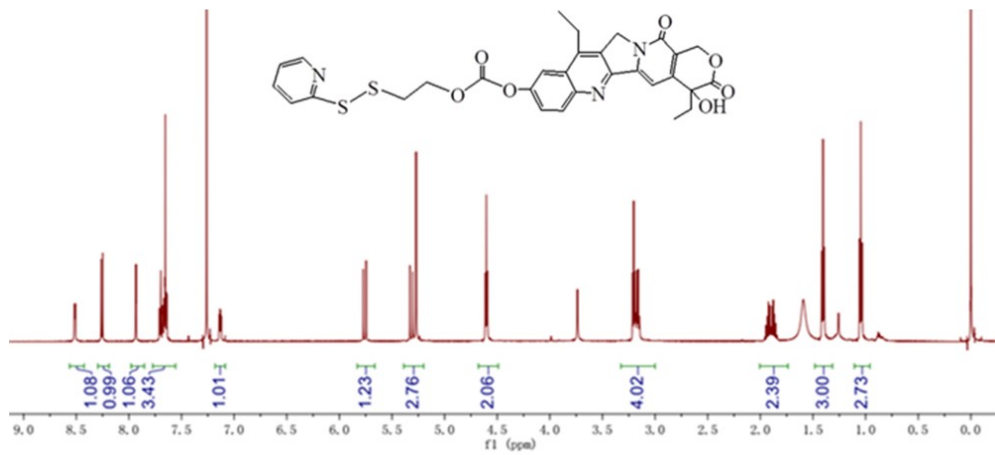

**Figure S1.**  $^1\text{H}$  NMR spectra. (A) 2-(Pyridin-2-yl)disulfanyl-ethanol. (B) 4-Nitrophenyl (2-(pyridin-2-yl)disulfanyl)ethyl carbonate. (C) SN38-SS-Py.

(A)  $^1\text{H}$  NMR (600 MHz,  $\text{CDCl}_3$ ):  $\delta$  8.50–8.33 (m, 1H), 7.63–7.46 (m, 1H), 7.35 (t,  $J$  = 10.3 Hz, 1H), 7.16–6.97 (m, 1H), 5.39 (s, 1H), 3.84–3.60 (m, 2H), 2.98–2.76 (m, 2H).

(B)  $^1\text{H}$  NMR (600 MHz,  $\text{CDCl}_3$ )  $\delta$  8.43 (d,  $J$  = 4.7 Hz, 1H), 8.28–8.15 (m, 2H), 7.6–7.49 (m, 2H), 7.39–7.23 (m, 2H), 7.05 (ddd,  $J$  = 23.1, 12.3, 9.9 Hz, 1H), 4.50 (t,  $J$  = 6.4 Hz, 2H), 3.09 (t,  $J$  = 6.4 Hz, 2H).

(C)  $^1\text{H}$  NMR (600 MHz,  $\text{CDCl}_3$ ):  $\delta$  8.51 (d,  $J$  = 4.6 Hz, 1H), 8.26 (d,  $J$  = 9.2 Hz, 1H), 7.93 (d,  $J$  = 2.5 Hz, 1H), 7.79–7.59 (m, 3H), 7.13 (dt,  $J$  = 29.3, 12.2 Hz, 1H), 5.76 (d,  $J$  = 16.2 Hz, 1H), 5.38–5.21 (m, 3H), 4.66–4.55 (m, 2H), 3.27–3.06 (m, 4H), 2.02–1.79 (m, 2H), 1.40 (t,  $J$  = 7.7 Hz, 3H), 1.05 (t,  $J$  = 7.4 Hz, 3H).

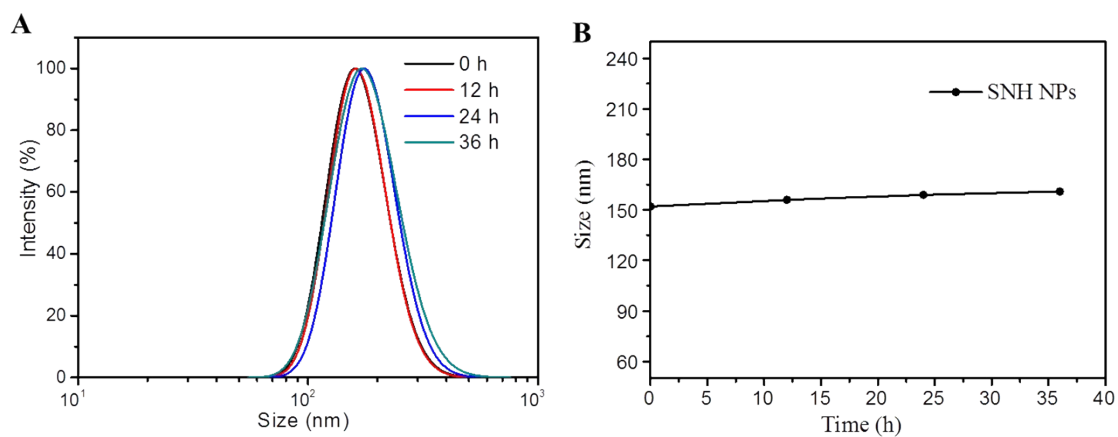

**Figure S2.** (A-B) Stability analysis of the SNH NPs with feed mole ratio 9:1 of SN38-SS-COOH:HSA based on the change of particle size at different time by DLS.

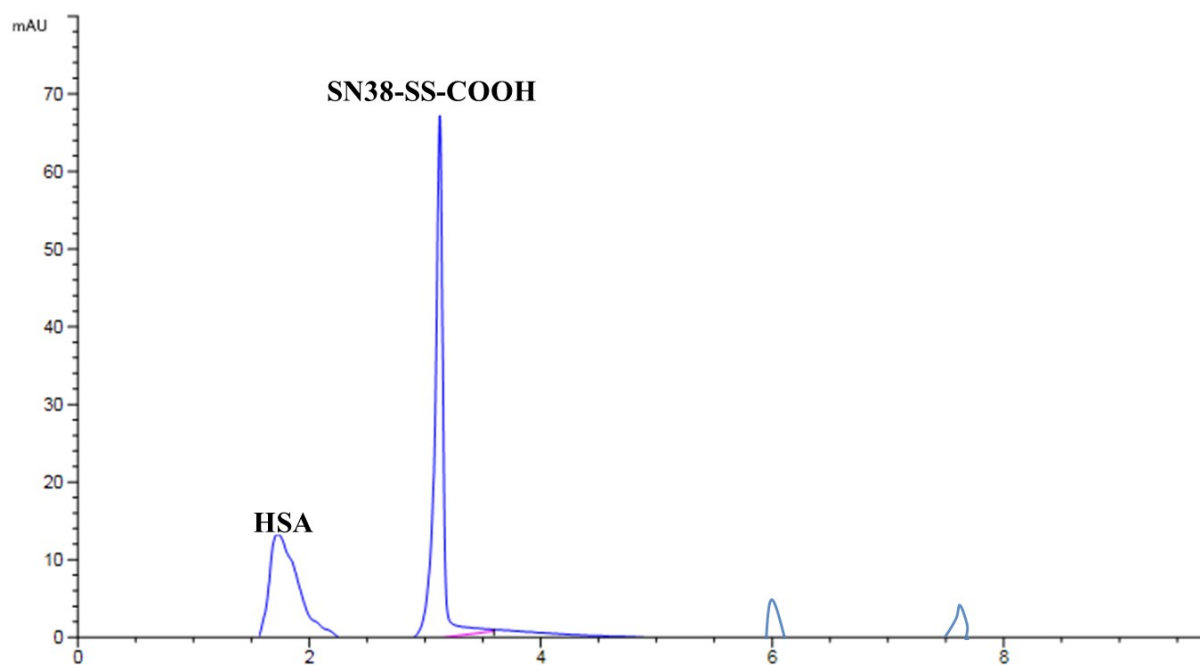

**Figure S3.** HPLC spectrum of the SNH NPs after 24 h incubation in PBS.

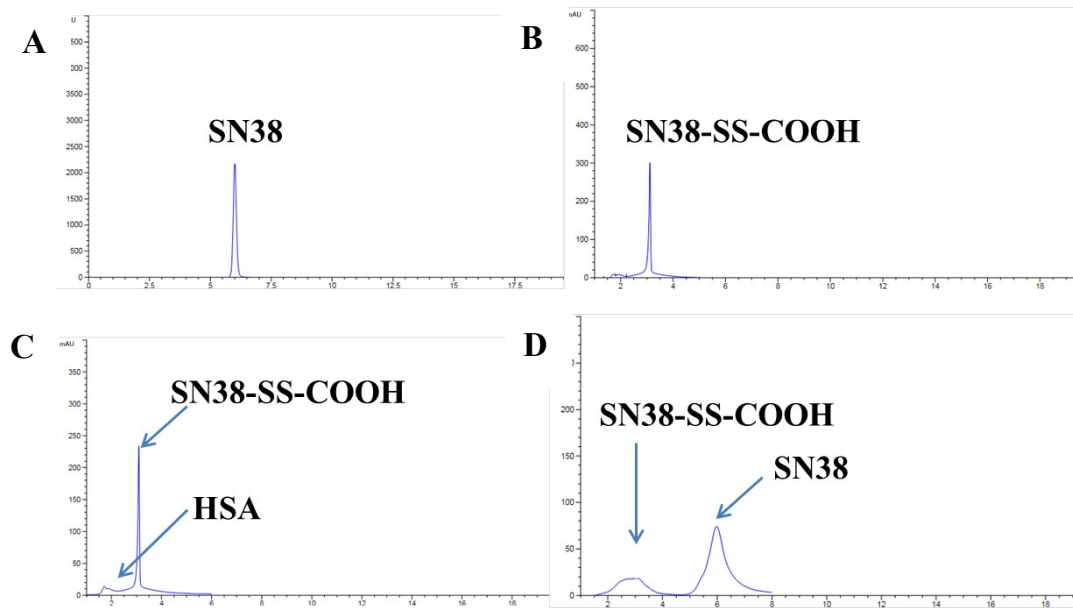

**Figure S4.** HPLC spectra. (A) SN38. (B) SN38-SS-COOH conjugate. (C) SNH NPs. (D) SNH NPs incubation in PBS with 20 mM GSH for 6 h.

**Table S1.** Physicochemical properties of the SNH NPs encapsulated with DiR.

| PS <sup>a</sup> | PDI <sup>b</sup> | ZP <sup>c</sup> /mV | LE <sup>d</sup> /% | LE <sup>e</sup> /% |
|-----------------|------------------|---------------------|--------------------|--------------------|
| 163±5.84        | 0.183±0.053      | -16.43±1.58         | 7.13               | 3.57               |

<sup>a</sup>Particle size, <sup>b</sup>Polydispersity index, <sup>c</sup>Zeta potential, <sup>d</sup>Loading efficiency of prodrug, <sup>e</sup>Loading efficiency of DiR.

**Table S2.** Cytotoxicity (IC<sub>50</sub><sup>a</sup> values) of free SN38, free SN38-SS-COOH, irinotecan and SNH NPs against four cancer cell lines by MTT assay.

| Group             | IC <sub>50</sub> (nmol/L)<br>in 231 cells | IC <sub>50</sub> (nmol/L)<br>in MCF-7 cells | IC <sub>50</sub> (nmol/L)<br>in KB cells | IC <sub>50</sub> (nmol/L)<br>in HeLa cells |
|-------------------|-------------------------------------------|---------------------------------------------|------------------------------------------|--------------------------------------------|
| Free SN38         | 225 ± 53                                  | 117 ± 76                                    | 135 ± 45                                 | 451 ± 113                                  |
| Free SN38-SS-COOH | >10 <sup>4</sup>                          | >10 <sup>4</sup>                            | 2836 ± 248                               | 5291 ± 534                                 |
| Irinotecan        | >10 <sup>4</sup>                          | >10 <sup>4</sup>                            | 4038 ± 563                               | >10 <sup>4</sup>                           |
| SNH NPs           | 1462 ± 235                                | 1893 ± 354                                  | 1598 ± 344                               | 2165 ± 387                                 |

a) Half inhibitory concentration, presented as equivalent concentrations of SN38.
